# Supplementary material
Source: PubMed Central journal article supplement (PMC9878551)
Supplement: NIHMS1864052-supplement-Appendix_A_S1.pdf [file NIHMS1864052-supplement-Appendix_A_S1.pdf]

| Appendix A. Literature search terms |                  |                      |
|-------------------------------------|------------------|----------------------|
| BHO                                 | Dabbing          | Shatter              |
| Budder                              | High potency     | Tetrahydrocannabinol |
| Butane hash oil                     | Marijuana        | THC                  |
| Cannabis                            | Oil              | Wax                  |
| Concentrate(s)                      | Rick Simpson oil |                      |
| dab                                 | RSO              |                      |
